# Supplementary material
Source: publisher figshare collection journal article supplement (https://acs.figshare.com/ndownloader/files/4196395)

**Figure S2.** Colocalization of DC-Chol-DOPC/DNA signals (red) with Lysosensor (lysosome marker, green), after 3 h of lipoplex treatment. This analysis reveals that DC-Chol-DOPC/DNA lipoplexes are largely delivered to the lysosomal compartments. The Pearson's coefficient (Rr) was calculated by using eleven cells. Scale bar = 10  $\mu$ m.

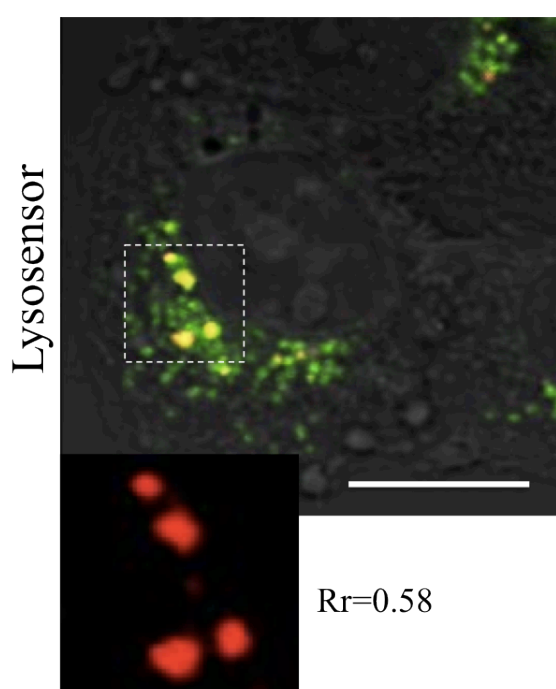

Supplement: Supplementary file 1 [file 4196395]
